# Supplementary material for: Tetrahydropyranyl: A Non‐aromatic, Mild‐Acid‐Labile Group for Hydroxyl Protection in Solid‐Phase Peptide Synthesis
Source: PubMed Central journal article supplement — ChemistryOpen. 2017 Mar 8;6(2):206–10. doi: 10.1002/open.201600157 (PMC5390794; doi:10.1002/open.201600157), 2017-03-08
Supplement: OPEN-6-206-s001.pdf [file OPEN-6-206-s001.pdf]

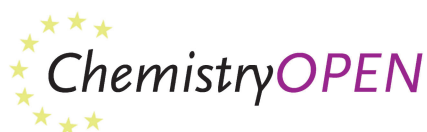

## Supporting Information

© 2017 The Authors. Published by Wiley-VCH Verlag GmbH & Co. KGaA, Weinheim

### **Tetrahydropyranyl: A Non-aromatic, Mild-Acid-Labile Group for Hydroxyl Protection in Solid-Phase Peptide Synthesis**

Anamika Sharma<sup>+</sup>,<sup>[a]</sup> Iván Ramos-Tomillero<sup>+</sup>,<sup>[b]</sup> Ayman El-Faham,<sup>[c, d]</sup> Hortensia Rodríguez,<sup>[e]</sup>  
Beatriz G. de la Torre,<sup>[a, f]</sup> and Fernando Albericio<sup>\*[a, b, c, g, h]</sup>

open\_201600157\_sm\_miscellaneous\_information.pdf

## Supporting Information

### Materials

All reagents and solvents were obtained from commercial suppliers and were used without further purification unless otherwise stated. 2-CTC resin and Fmoc-amino acids were purchased from GL Biochem Pvt. Ltd., China. Ellman resin was purchased from Merck. NMR spectra ( $^1\text{H}$  NMR and  $^{13}\text{C}$  NMR) were recorded on a Bruker AVANCE III 400 MHz spectrometer. Chemical shift values are expressed in ppm. At short reaction times (2-5 min), the reactions were manually stirred with a Teflon stick, meanwhile for long reactions times (>30 min) the reactions were stirred on a Unimax 1010 shaker from Heidolph instruments. Solvents were removed from the reactor by vacuum suction. All the reactions were carried out at room temperature (~25 °C). Every reaction step was followed of washings of the peptide-resin with DMF (4×1 min) and DCM (4×1 min). Analytical HPLC was performed on an Agilent 1100 system using a Phenomenex  $\text{C}_{18}$  (3  $\mu\text{m}$ , 4.6 x 50 mm) column. Buffer A: 0.1 % TFA in  $\text{H}_2\text{O}$ ; buffer B: 0.1 % TFA in  $\text{CH}_3\text{CN}$ . LC-MS was performed on a Shimadzu 2020 UFLC-MS using an YMC-Triart  $\text{C}_{18}$  (5  $\mu\text{m}$ , 4.6 × 150 mm) column and data processing was carried out by LabSolution software. Buffer A: 0.1 % formic acid in  $\text{H}_2\text{O}$ ; buffer B: 0.1 % formic acid in  $\text{CH}_3\text{CN}$ . High resolution mass spectrometry (HRMS) was performed using a Bruker ESI-QTOF mass spectrometer in positive mode.

## Spectroscopic Characterization

**Fmoc-Ser(Thp)-OH:** It was obtained as pure white solid (478 mg, 76 %).

**HPLC:** (H<sub>2</sub>O/MeCN 5:95) *t<sub>R</sub>*: 10.4 min.

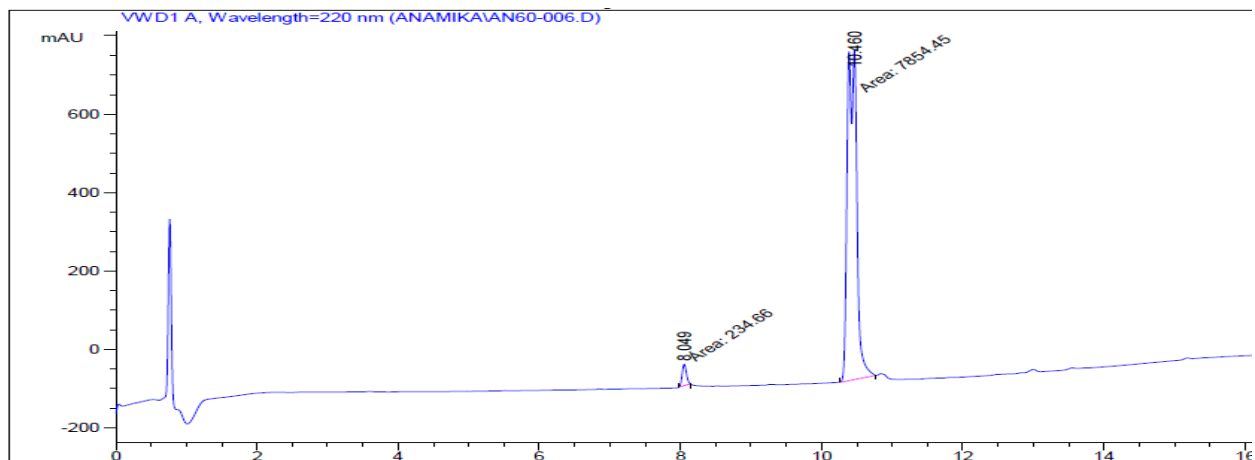

**LCMS:** *m/z* calculated for C<sub>23</sub>H<sub>25</sub>NO<sub>6</sub> = 411.45; found = 410 [M-H]<sup>+</sup>, being M the molecular weight of Fmoc-Ser(Thp)-OH.

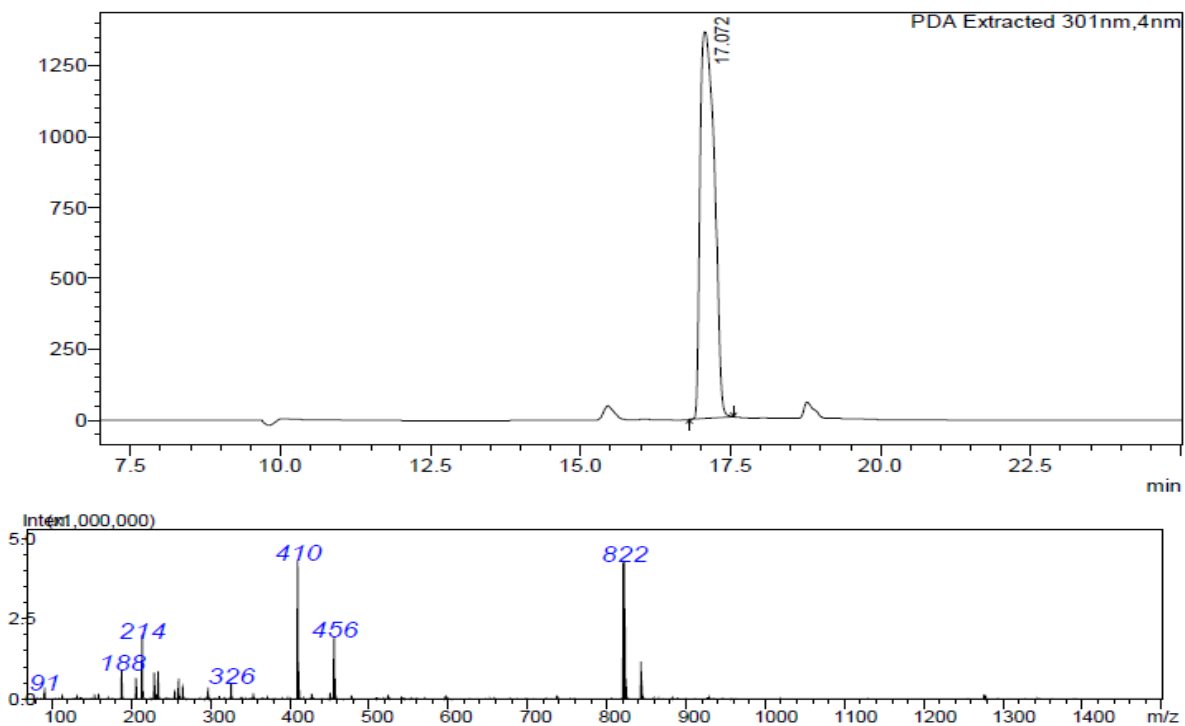

**HRMS:** Calculated for  $C_{23}H_{26}NO_6$   $[M+H] = 412.1760$ ; found = 412.1745  $[M+H]$ ; where M is the molecular weight of Fmoc-Ser(Thp)-OH.

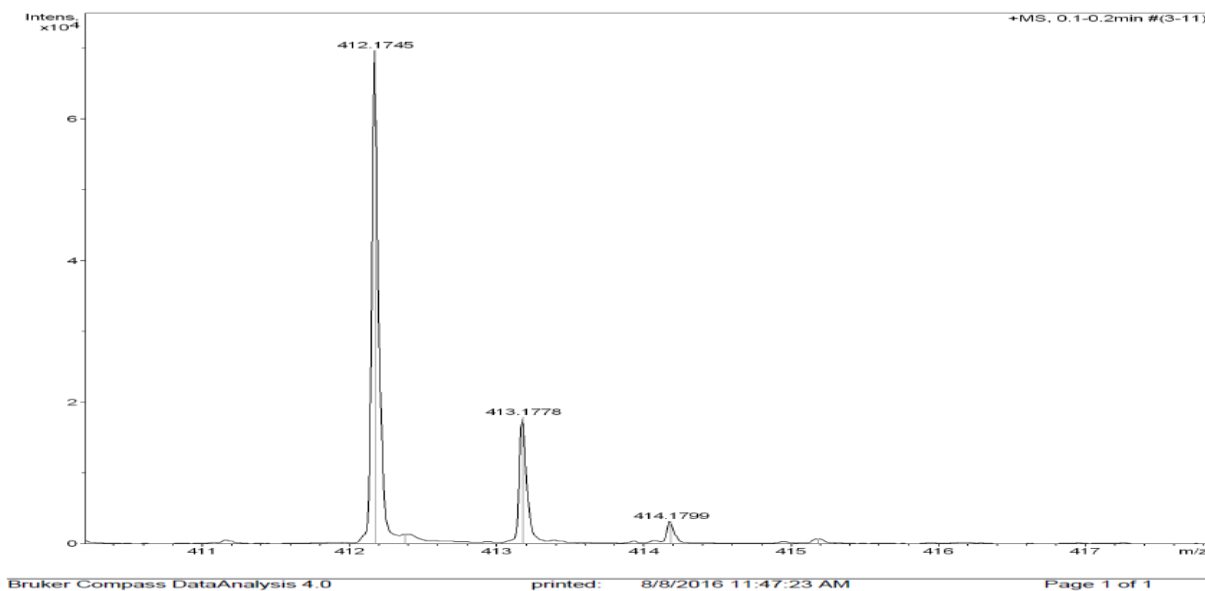

**$^1H$  NMR (400 MHz, DMSO- $d_6$ ):**

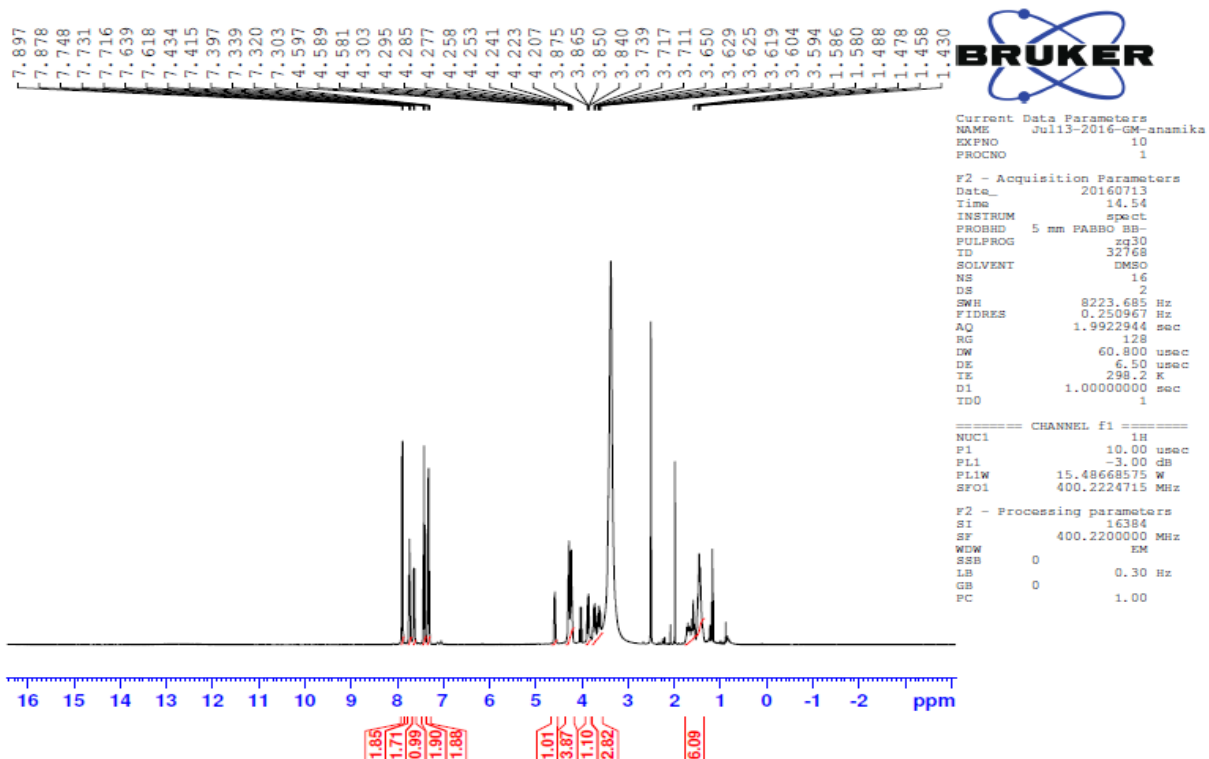

# <sup>13</sup>C NMR(100 MHz, DMSO-d<sub>6</sub>):

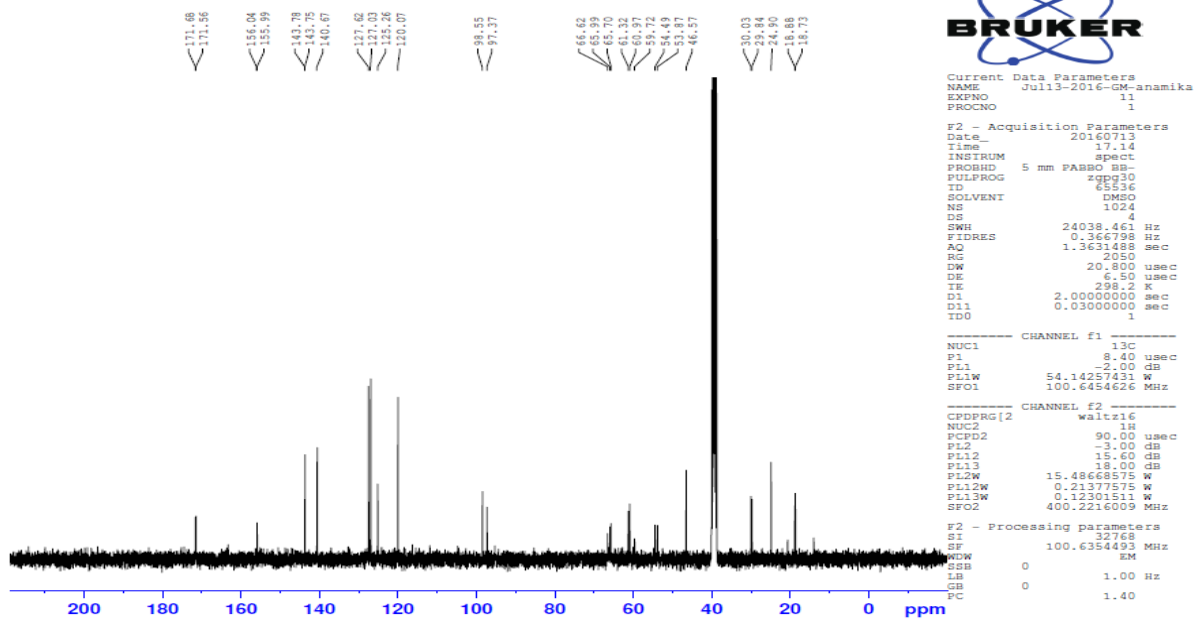

## Spectroscopic Characterization

**Fmoc-Thr(Thp)-OH:** It was obtained as pure white solid (453 mg, 73 %).

**HPLC:** (H<sub>2</sub>O/MeCN 5:95) *t<sub>R</sub>*: 10.8 min.

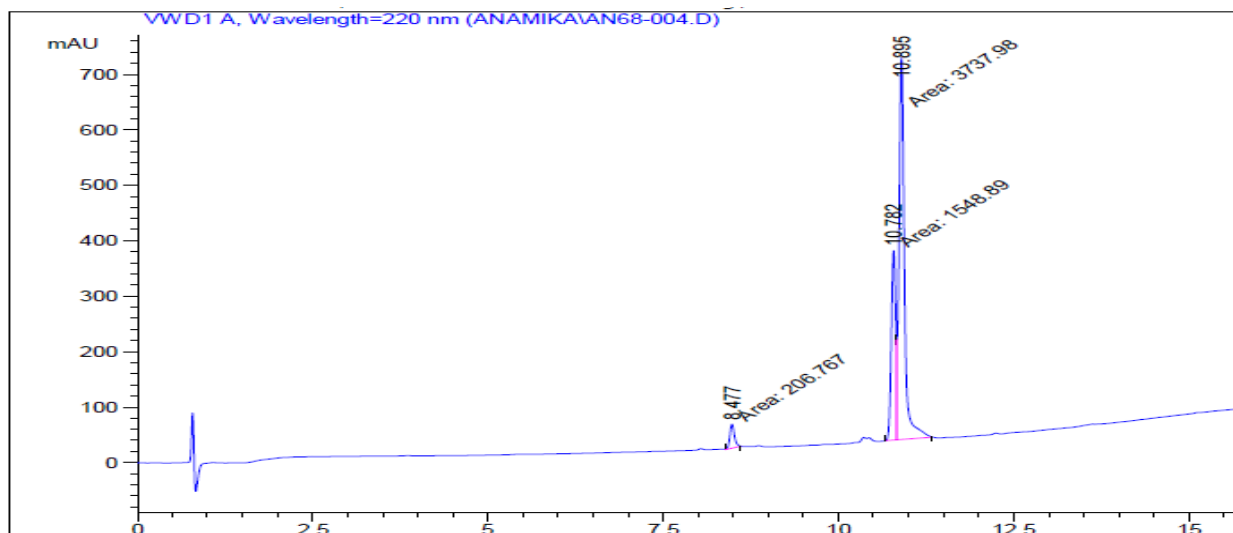

**LCMS:**  $m/z$  calculated for  $C_{23}H_{25}NO_6 = 425.18$ ; found = 424  $[M-H]^+$ , being M the molecular weight of Fmoc-Thr(Thp)-OH.

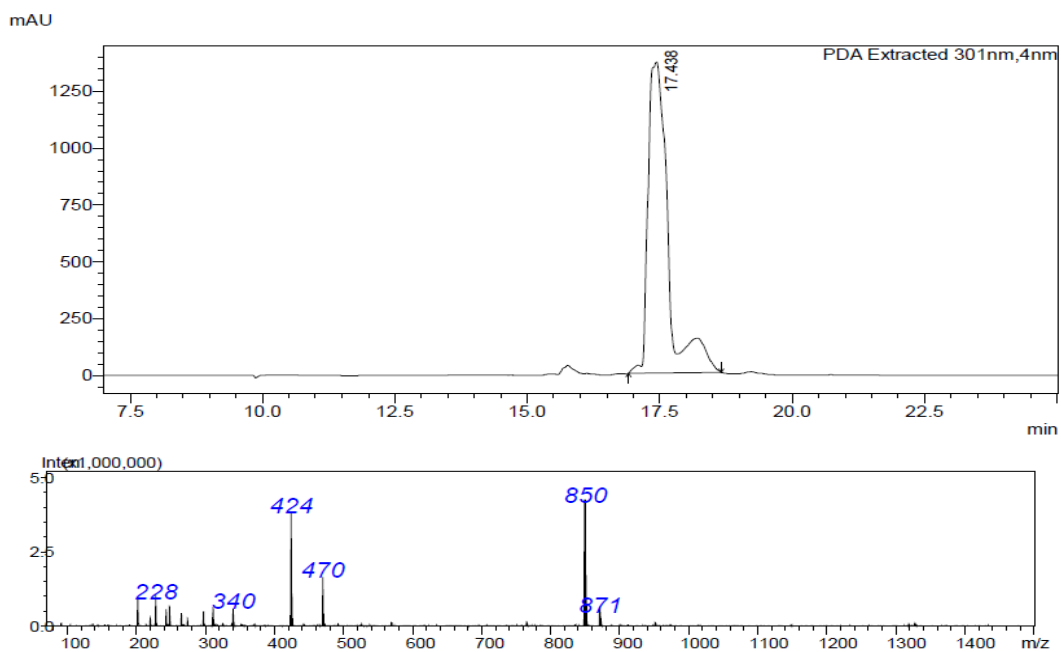

**HRMS:** Calculated for  $C_{24}H_{28}NO_6 [M+H] = 426.1917$ ; found = 426.1896  $[M+H]$ , where M is the molecular weight of Fmoc-Thr(Thp)-OH.

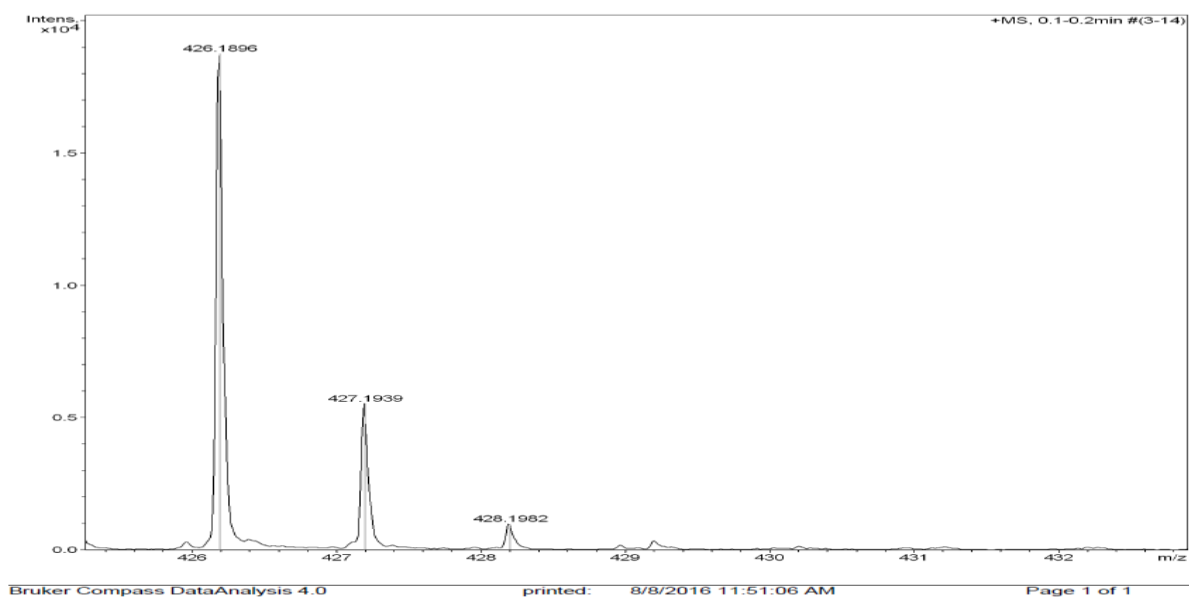

<sup>1</sup>H NMR (400 MHz, DMSO-d<sub>6</sub>):

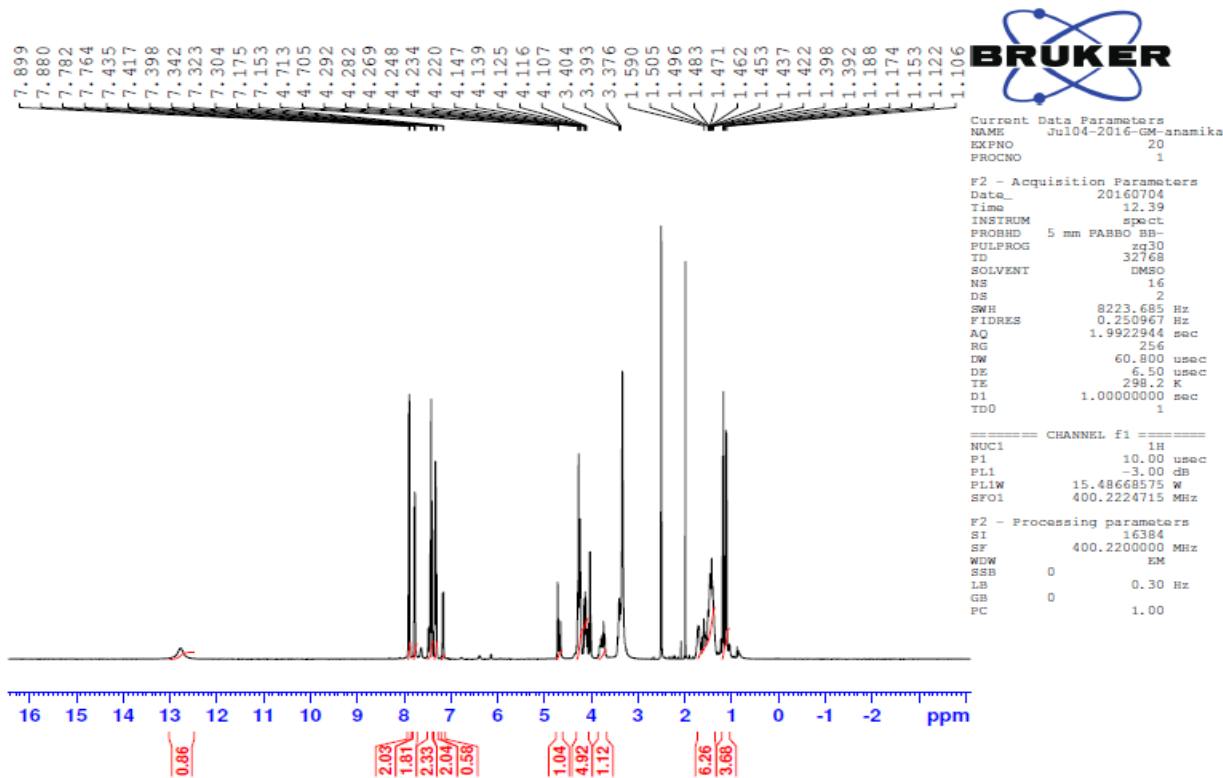

<sup>13</sup>C NMR(100 MHz, DMSO-d<sub>6</sub>):

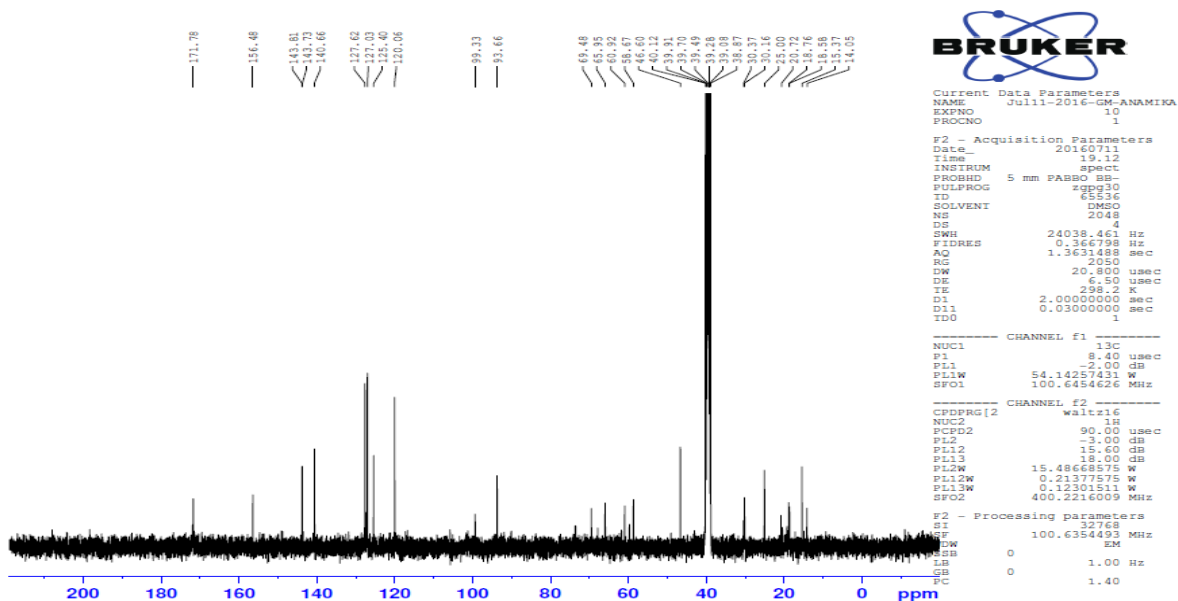

## ACID LABILITY STUDIES OF Fmoc-Ser(Thp)-OH

1. 1 mg of compound was weighed in vial.
2. Added 200  $\mu$ L of cocktail.
3. After 15 min, 30 min and 60 min 20  $\mu$ L was taken, diluted with acetonitrile (400  $\mu$ L) and injected in HPLC (5:95 gradient).

| Cocktail          | Min | CHROMATOGRAM                                                 |
|-------------------|-----|--------------------------------------------------------------|
| 1:99<br>(TFA:DCM) | 15  | <p>VWD1 A, Wavelength=220 nm (ANAMIKA\AN61-001.D)</p>        |
|                   | 30  | <p>VWD1 A, Wavelength=220 nm (ANAMIKA\AN61-002.D)</p>        |
|                   | 60  | <p>VWD1 A, Wavelength=220 nm (ANAMIKA\AN61-003.D)</p>        |
| 2:98              | 15  | <p>VWD1 A, Wavelength=220 nm (ANAMIKA\SERINE\AN60-011.D)</p> |



|                                              |    |                                                                                                                     |
|----------------------------------------------|----|---------------------------------------------------------------------------------------------------------------------|
|                                              | 30 | <p>VWD1 A, Wavelength=220 nm (ANAMIKA\SERINEVAN60-013.D)</p> <p>8.030 Area: 2184.73</p> <p>10.360 Area: 720.797</p> |
|                                              | 60 | <p>VWD1 A, Wavelength=220 nm (ANAMIKA\SERINEVAN60-014.D)</p> <p>8.029 Area: 3519.34</p> <p>10.413 Area: 141.586</p> |
| 2:0.5:97.5<br>(TFA:H <sub>2</sub> O:<br>DCM) | 15 | <p>VWD1 A, Wavelength=220 nm (ANAMIKA\AN66-001.D)</p> <p>8.038 Area: 2402.9</p> <p>10.445 Area: 154.381</p>         |
|                                              | 30 | <p>VWD1 A, Wavelength=220 nm (ANAMIKA\AN66-002.D)</p> <p>8.025 Area: 2336.01</p> <p>10.430 Area: 108.846</p>        |

|                                 |    |                                                                                                                                                                                                                                                                                                                   |
|---------------------------------|----|-------------------------------------------------------------------------------------------------------------------------------------------------------------------------------------------------------------------------------------------------------------------------------------------------------------------|
|                                 | 60 | 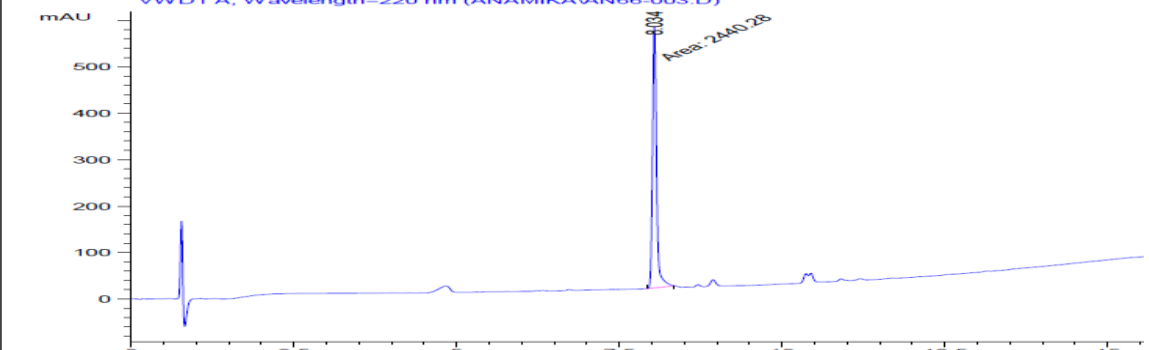 <p>VWD1 A, Wavelength=220 nm (ANAMIKA\AN66-003.D)</p> <p>mAU</p> <p>500<br/>400<br/>300<br/>200<br/>100<br/>0</p> <p>0 2.5 5 7.5 10 12.5 15</p> <p>8.004<br/>Area: 2440.28</p>                                                 |
| 2:0.5:97.5<br>(TFA:TIS:D<br>CM) | 15 |  <p>VWD1 A, Wavelength=220 nm (ANAMIKA\AN66-004.D)</p> <p>mAU</p> <p>350<br/>300<br/>250<br/>200<br/>150<br/>100<br/>50<br/>0<br/>-50</p> <p>0 2.5 5 7.5 10 12.5 15</p> <p>8.000<br/>Area: 1458.44</p>                          |
| 5:95<br>(TFA:DCM)               | 15 |  <p>VWD1 A, Wavelength=220 nm (ANAMIKA\AN61-008.D)</p> <p>mAU</p> <p>300<br/>250<br/>200<br/>150<br/>100<br/>50<br/>0<br/>-50</p> <p>0 2.5 5 7.5 10 12.5 15</p> <p>8.046<br/>Area: 1288.08</p> <p>10.983<br/>Area: 149.974</p> |
|                                 | 30 |  <p>VWD1 A, Wavelength=220 nm (ANAMIKA\AN61-010.D)</p> <p>mAU</p> <p>400<br/>300<br/>200<br/>100<br/>0</p> <p>0 2.5 5 7.5 10 12.5 15</p> <p>8.044<br/>Area: 1837.96</p>                                                       |

|                                                  |           |                                                       |
|--------------------------------------------------|-----------|-------------------------------------------------------|
| <p>10:90<br/>(TFA:DCM)</p>                       | <p>15</p> | <p>VWD1 A, Wavelength=220 nm (ANAMIKA\AN61-006.D)</p> |
|                                                  | <p>30</p> | <p>VWD1 A, Wavelength=220 nm (ANAMIKA\AN61-005.D)</p> |
| <p>10:2:88<br/>(TFA:H<sub>2</sub>O:<br/>DCM)</p> | <p>15</p> | <p>VWD1 A, Wavelength=220 nm (ANAMIKA\AN61-007.D)</p> |
| <p>10:2:88<br/>(TFA:TIS:D<br/>CM)</p>            | <p>15</p> | <p>VWD1 A, Wavelength=220 nm (ANAMIKA\AN61-009.D)</p> |

## ACID LABILITY STUDIES OF Fmoc-Thr(Thp)-OH

1. 1 mg of compound was weighed in vial.
2. Added 200  $\mu$ L of cocktail.
3. After 15 min, 30 min and 60 min 20  $\mu$ L was taken, diluted with acetonitrile (400  $\mu$ L) and injected in HPLC (5:95 gradient).

| Cocktail          | Mi<br>n | CHROMATOGRAM                                                                                                        |
|-------------------|---------|---------------------------------------------------------------------------------------------------------------------|
| Fmoc-Thr-OH       |         | <p>VWD1 A, Wavelength=220 nm (ANAMIKA\AN68-002.D)</p> <p>8.473<br/>Area: 9853.88</p>                                |
| 1:99<br>(TFA:DCM) | 15      | <p>VWD1 A, Wavelength=220 nm (ANAMIKA\AN68-005.D)</p> <p>8.423<br/>Area: 8208.73</p> <p>10.858<br/>Area: 1803</p>   |
|                   | 30      | <p>VWD1 A, Wavelength=220 nm (ANAMIKA\AN68-006.D)</p> <p>8.413<br/>Area: 5265.4</p> <p>10.852<br/>Area: 1221.05</p> |

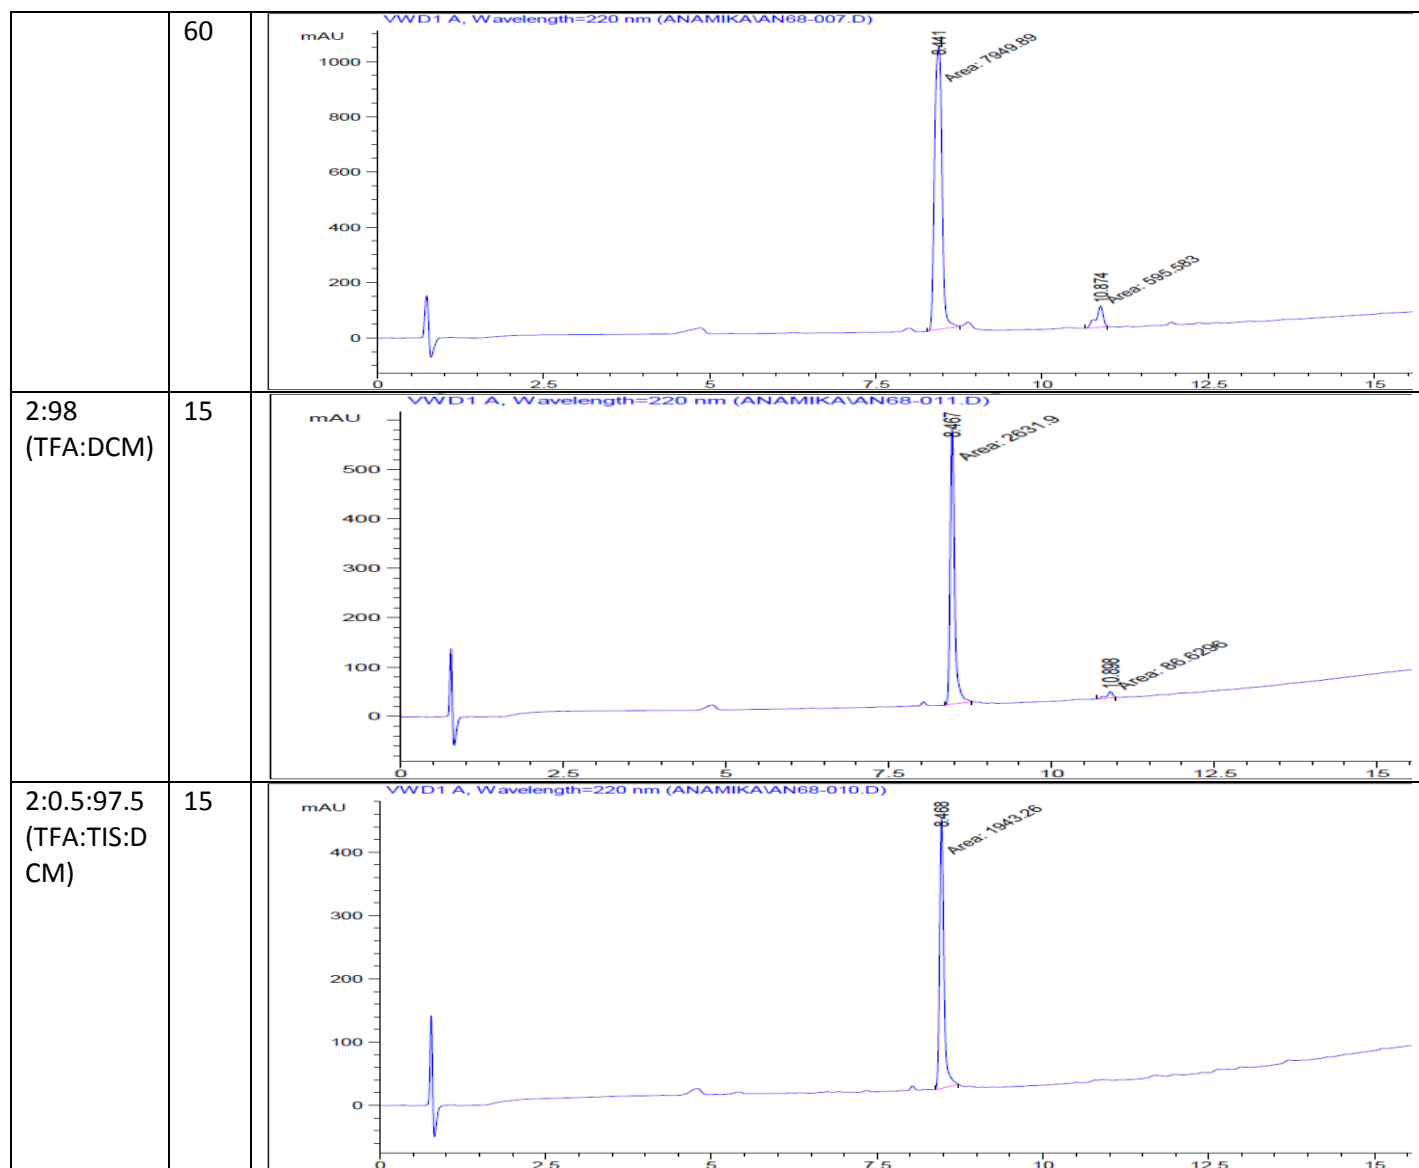

### Synthesis and acid lability studies of Fmoc-Ala-Ser(Thp)-Leu-OH

1. CTC resin was used for synthesis of Fmoc-Ala-Ser(Thp)-Leu-OH using DIPCDI/Oxyma Pure as coupling reagent.
2. Peptide was used to study acid lability studies.
3. 5 mg of resin was weighed in vial.
4. Added 500  $\mu$ L of cocktail.
5. After 15 min, 30 min and 60 min 20  $\mu$ L was taken, diluted with acetonitrile (400  $\mu$ L) and injected in HPLC (5:95 gradient).

|                                                     |           |                                                                                                               |
|-----------------------------------------------------|-----------|---------------------------------------------------------------------------------------------------------------|
| <p>2:0.5:97.5<br/>(TFA:H<sub>2</sub>O:<br/>DCM)</p> | <p>15</p> | <p>VWD1 A, Wavelength=220 nm (ANAMIKA\AN66-007.D)</p> <p>0.981 Area: 17538.16</p> <p>10.635 Area: 104.891</p> |
|                                                     | <p>30</p> | <p>VWD1 A, Wavelength=220 nm (ANAMIKA\AN66-008.D)</p> <p>0.994 Area: 2892.25</p> <p>10.647 Area: 114.949</p>  |
|                                                     | <p>60</p> | <p>VWD1 A, Wavelength=220 nm (ANAMIKA\AN66-009.D)</p> <p>0.978 Area: 2891.08</p> <p>10.636 Area: 106.532</p>  |
| <p>2:0.5:97.5<br/>(TFA:TIS:D<br/>CM)</p>            | <p>15</p> | <p>VWD1 A, Wavelength=220 nm (ANAMIKA\AN66-013.D)</p> <p>0.973 Area: 1015.5</p>                               |

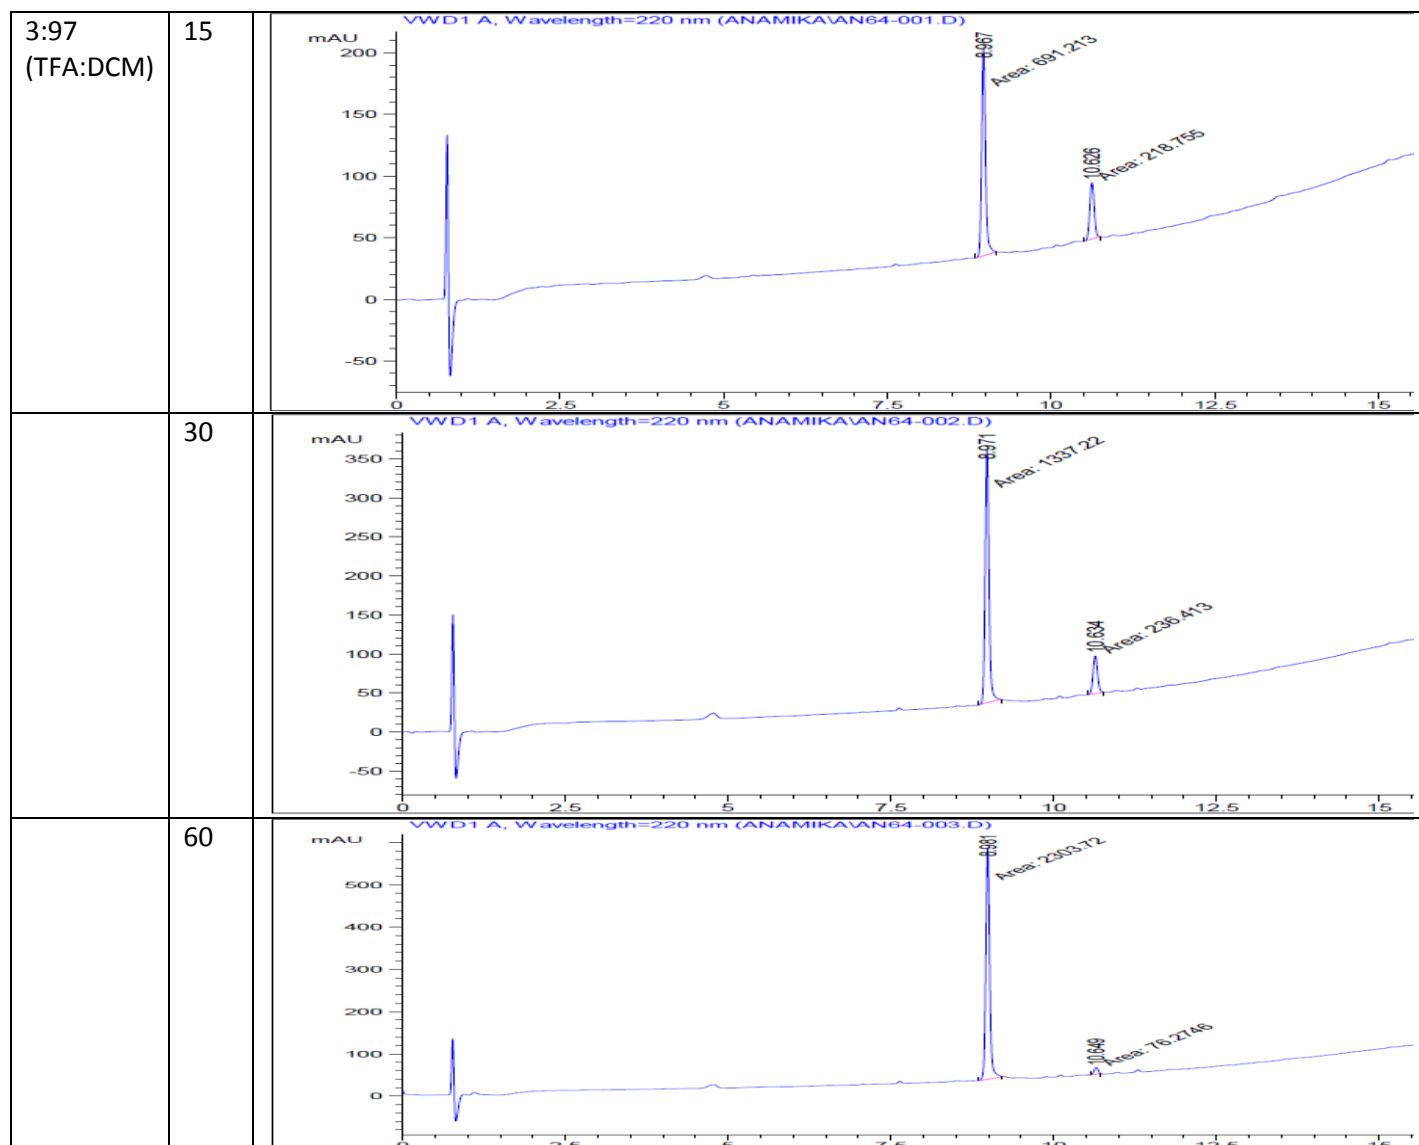

### Synthesis and acid lability studies of Fmoc-Ala-Thr(Thp)-Leu-OH

1. CTC resin was used for synthesis of Fmoc-Ala-Thr(Thp)-Leu-OH using DIPCDI/Oxyma Pure as coupling reagent.
2. Peptide was used to study acid lability studies.
3. 5 mg of resin was weighed in vial.
4. Added 500  $\mu$ L of cocktail.
5. After 15 min, 30 min and 60 min 20  $\mu$ L was taken, diluted with acetonitrile (400  $\mu$ L) and injected in HPLC (5:95 gradient).

| Cocktail          | Min | CHROMATOGRAM                                                                                                         |
|-------------------|-----|----------------------------------------------------------------------------------------------------------------------|
| 1:99<br>(TFA:DCM) | 15  | <p>VWD1 A, Wavelength=220 nm (ANAMIKA\AN69-001.D)</p> <p>9.277<br/>Area: 1557.21</p> <p>11.182<br/>Area: 585.452</p> |
|                   | 30  | <p>VWD1 A, Wavelength=220 nm (ANAMIKA\AN69-003.D)</p> <p>9.287<br/>Area: 2310.96</p> <p>11.204<br/>Area: 231.981</p> |
|                   | 60  | <p>VWD1 A, Wavelength=220 nm (ANAMIKA\AN69-004.D)</p> <p>9.293<br/>Area: 2697.13</p> <p>11.188<br/>Area: 183.143</p> |
| 2:98<br>(TFA:DCM) | 15  | <p>VWD1 A, Wavelength=220 nm (ANAMIKA\AN69-002.D)</p> <p>9.288<br/>Area: 2322.96</p>                                 |
